# Supplementary material
Source: Frontiers journal article supplement (https://www.frontiersin.org/articles/321958)
Supplement: Presentation_1.PDF [file Presentation_1.PDF]

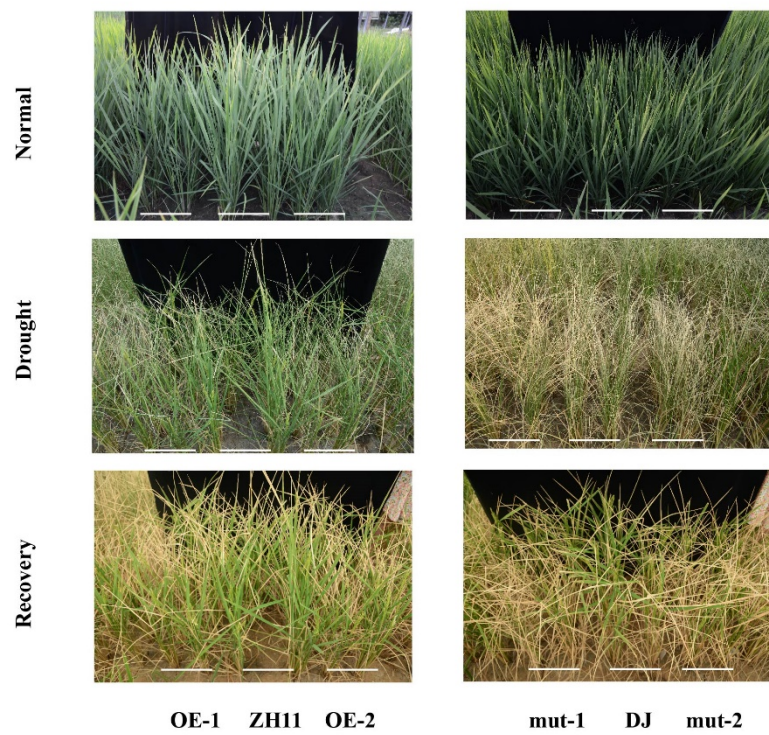

Supplementary Figure 1. Drought resistance analysis of the transgenic and wild-type plants in a refine paddy field facilitated with a movable rain-off shelter.
